# Supplementary material for: Chemical Profile, Antibacterial, Antibiofilm, and Antiviral Activities of Pulicaria crispa Most Potent Fraction: An In Vitro and In Silico Study
Source: MDPI journal article supplement (doi:10.3390/molecules28104184), 2023-05-19
Supplement: s1 [file s1]

# Chemical profile, antibacterial, antibiofilm, and antiviral activities of *Pulicaria crispa* most potent fraction: An in-vitro and in-silico study

## Supplementary material

**Table S1.** RT-qPCR data analysis using double delta Ct analysis of DNA gyrase B gene.

| Samples | Gene being Tested Experimental (TE) | Gene being Tested Control (TC) | Housekeeping Gene Experimental (HE) | Housekeeping Gene Control (HC) | $\Delta$ Ct values for the experimental ( $\Delta$ CTE) | $\Delta$ Ct values for the control ( $\Delta$ CTC) | Delta Ct Value ( $\Delta\Delta$ Ct) | $2^{\Delta\Delta$ Ct (expression fold change) |
|---------|-------------------------------------|--------------------------------|-------------------------------------|--------------------------------|---------------------------------------------------------|----------------------------------------------------|-------------------------------------|-----------------------------------------------|
| Control | 24.8                                | 21.7                           | 24.3                                | 21.2                           | 0.5                                                     | 0.5                                                | 0                                   | 1.0                                           |
| Treated | 25.3                                | 21.7                           | 24                                  | 21.2                           | 1.3                                                     | 0.5                                                | 0.8                                 | 0.6                                           |

**Table S2.** RT-qPCR data analysis using double delta Ct analysis of penicillin-binding proteins (PBP2A) gene.

| Samples | Gene being Tested Experimental (TE) | Gene being Tested Control (TC) | Housekeeping Gene Experimental (HE) | Housekeeping Gene Control (HC) | $\Delta$ Ct values for the experimental ( $\Delta$ CTE) | $\Delta$ Ct values for the control ( $\Delta$ CTC) | Delta Ct Value ( $\Delta\Delta$ Ct) | $2^{\Delta\Delta$ Ct (expression fold change) |
|---------|-------------------------------------|--------------------------------|-------------------------------------|--------------------------------|---------------------------------------------------------|----------------------------------------------------|-------------------------------------|-----------------------------------------------|
| Control | 32                                  | 22.1                           | 31.4                                | 21.5                           | 0.6                                                     | 0.6                                                | 0                                   | 1.0                                           |
| Treated | 32.2                                | 22.1                           | 31.1                                | 21.5                           | 1.1                                                     | 0.6                                                | 0.5                                 | 0.7                                           |

**Table S3.** Types of interactions and docking energy scores of  $\beta$ -sitosterol, phytol, stigmasterol, lupeol, and EZ6 against DNA gyrase B.

| DNA Gyrase B, PDB ID: 6m1j      |                     |                    |                                      |                    |                                                   |
|---------------------------------|---------------------|--------------------|--------------------------------------|--------------------|---------------------------------------------------|
| Compound                        | $\beta$ -Sitosterol | Phytol             | Stigmasterol                         | Lupeol             | Co- crystal Ligand (EZ6)                          |
| Docking energy score (Kcal/mol) | -12.38              | -10.84             | -11.25                               | -11.25             | -12.40                                            |
|                                 | Val73/H-Bond/3.33   | Arg138/H-Bond/3.19 | Ile80/Alkyl/4.57<br>Ile80/Alkyl/5.10 | Asn48/ H-Bond/3.03 | Arg78/Attractive charge/4.70<br>Asp75/H-Bond/3.14 |

|                                                     |                  |                   |                   |                   |                                     |
|-----------------------------------------------------|------------------|-------------------|-------------------|-------------------|-------------------------------------|
| <b>Amino acids/<br/>Bond type/<br/>Distance (Å)</b> | Ile80/Alkyl/4.81 | Val73/Alkyl/4.12  | Val169/Alkyl/5.08 | Val45/H-          | Asp75/H-Bond/2.95                   |
|                                                     | Ile80/Alkyl/5.00 | Val169/Alkyl/4.72 | Arg78/Alkyl/4.66  | Bond/2.87         | Pro81/C-H-Bond/3.45                 |
|                                                     | Ile80/Alkyl/5.18 | Ile80/Alkyl/4.08  | Val73/Alkyl/5.14  | Ile80/Alkyl/4.51  | Pro81/C-H-Bond/3.52                 |
|                                                     | Arg78/Alkyl/3.92 | Pro81/Alkyl/4.23  | Val169/Alkyl/5.26 | Ile96/Alkyl/4.62  | Gly79/C-H-Bond/3.52                 |
|                                                     |                  |                   | Val45/Alkyl/5.40  | Ile80/Alkyl/4.72  | Gly79/C-H-Bond/3.44                 |
|                                                     |                  |                   |                   | Ile80/Alkyl/5.07  | Asn48/Halogen/3.43                  |
|                                                     |                  |                   |                   | Val169/Alkyl/5.26 | Arg78/Pi-Cation/3.12                |
|                                                     |                  |                   |                   | Val45/Alkyl/4.86  | Glu52/Pi-Anion/4.52                 |
|                                                     |                  |                   |                   | Val73/Alkyl/4.77  | Thr167/ Pi-Donor Hydrogen Bond/3.60 |
|                                                     |                  |                   |                   | Ile80/Alkyl/3.78  | Ile80/Pi-Sigma/3.80                 |
|                                                     |                  |                   |                   | Pro81/Alkyl/4.97  | Pro81/Alkyl/4.77                    |
|                                                     |                  |                   |                   |                   | Pro81/Alkyl/4.55                    |
|                                                     |                  |                   |                   |                   | Ile96/Akyl/4.54                     |
|                                                     |                  |                   |                   |                   | Ile80/Pi-Alkyl/4.71                 |
|                                                     |                  |                   |                   |                   | Ile80/Pi-Alkyl/4.92                 |
|                                                     |                  |                   |                   |                   | Pro81/Pi-Alkyl/4.80                 |
|                                                     |                  |                   |                   |                   | Ile80/Pi-Alkyl/4.74                 |
|                                                     |                  |                   |                   |                   | Ile96/Pi-Alkyl/5.15                 |

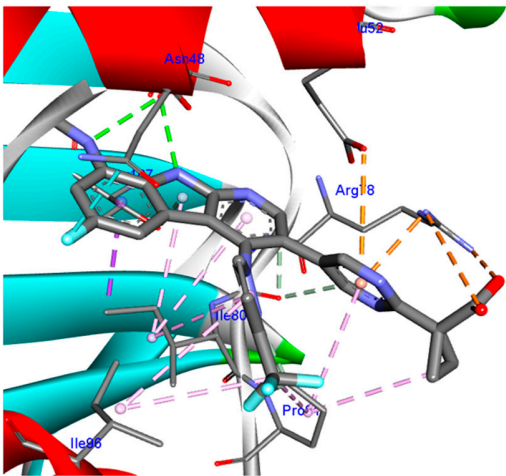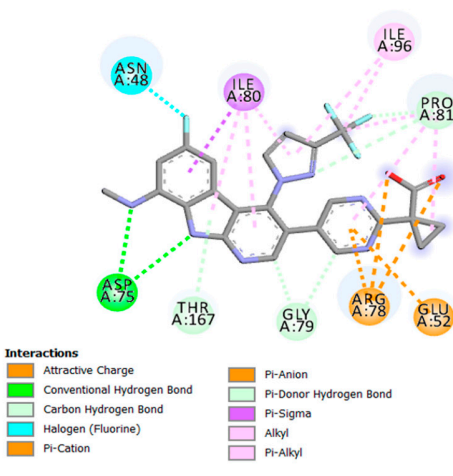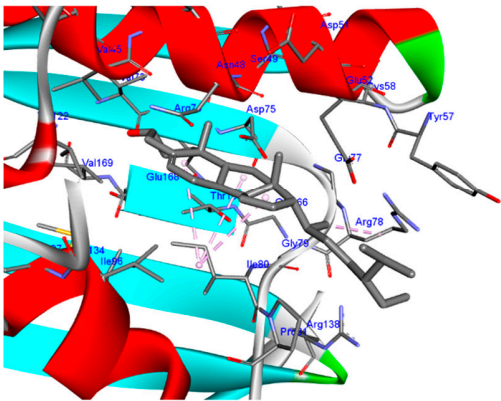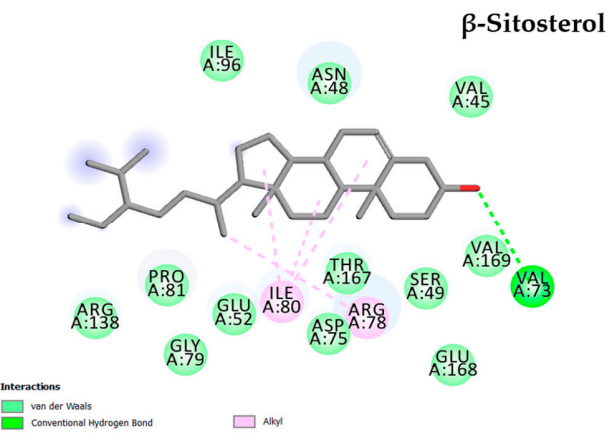



**Table S4.** Types of interactions and docking energy scores of  $\beta$ -sitosterol, phytol, stigmasterol, lupeol, and ceftobiprole against PBP2A.

| Penicillin-binding protein (PBP2A), PDB ID: 4dki |                      |                                          |                      |                                            |                                                                 |
|--------------------------------------------------|----------------------|------------------------------------------|----------------------|--------------------------------------------|-----------------------------------------------------------------|
| Compound                                         | $\beta$ -Sitosterol  | Phytol                                   | Stigmasterol         | Lupeol                                     | Ceftobiprole                                                    |
| Docking energy score (Kcal/ mol)                 | -14.45               | -12.03                                   | -15.65               | -14.20                                     | -15.20                                                          |
| Amino acids/<br>Bond type/<br>Distance (Å)       | Thr444/H-Bond/3.01   | Ser598/H-Bond/2.92<br>His583/H-Bond/2.94 | Thr444/H-Bond/3.05   | Gln521/H-Bond/2.75<br>Tyr446/Pi-Sigma/3.57 | Lys406/ Attractive Charge/4.93<br>Lys597 Attractive Charge/4.13 |
|                                                  | Tyr519/H-Bond/2.99   | Tyr446/Pi-Sigma/3.90                     | Tyr519/H-Bond/3.19   | Met641/Alkyl/4.35                          |                                                                 |
|                                                  | Met641/Alkyl/3.83    | Ala601/Alkyl/3.95                        | Tyr446/Pi-Sigma/3.90 | Ala642/Alkyl/4.13                          | Ser462/H-Bond/3.28                                              |
|                                                  | Tyr446/Pi-Alkyl/5.12 | Tyr446/Pi-Alkyl/5.14                     | Met641/Alkyl/4.71    | Met641/Alkyl/4.85                          | Asn464/H-Bond/2.87                                              |
|                                                  | Tyr446/Pi-Alkyl/4.32 |                                          | Met641/Alkyl/4.19    | Met641/Alkyl/3.46                          | Gly520/H-Bond/2.84                                              |
|                                                  | His583/Pi-Alkyl/4.62 |                                          | Tyr446/Pi-Alkyl/4.92 | Tyr446/ Pi-Alkyl/4.27                      | Ser403/H-Bond/3.31                                              |
|                                                  |                      |                                          | Tyr446/Pi-Alkyl/4.71 | Tyr446/Pi-Alkyl/5.26                       | Thr600/H-Bond/3.37                                              |
|                                                  |                      |                                          |                      | Tyr446/Pi-Alkyl/4.72                       | Ser643/H-Bond/3.03                                              |
|                                                  |                      |                                          |                      |                                            | Thr600/Sulfur/3.30                                              |
|                                                  |                      |                                          |                      |                                            | Ala601/Pi-Sigma/3.86<br>Trp616/Pi-Sulfur/4.85                   |

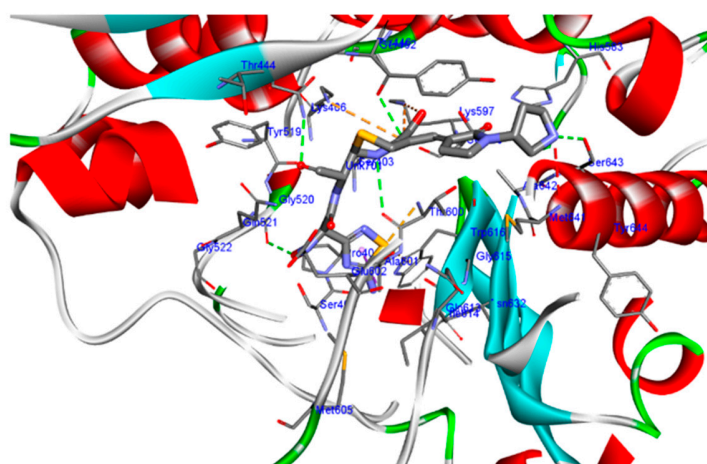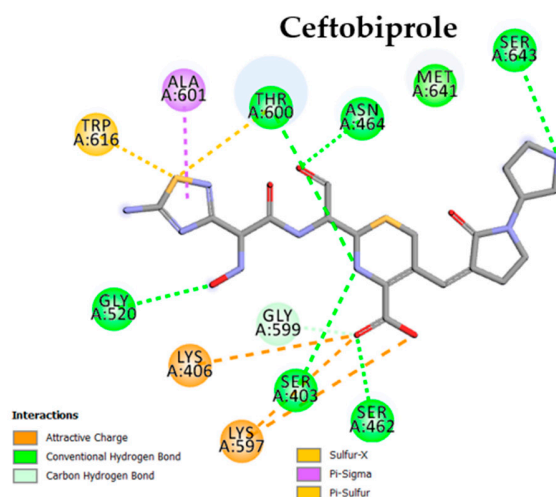



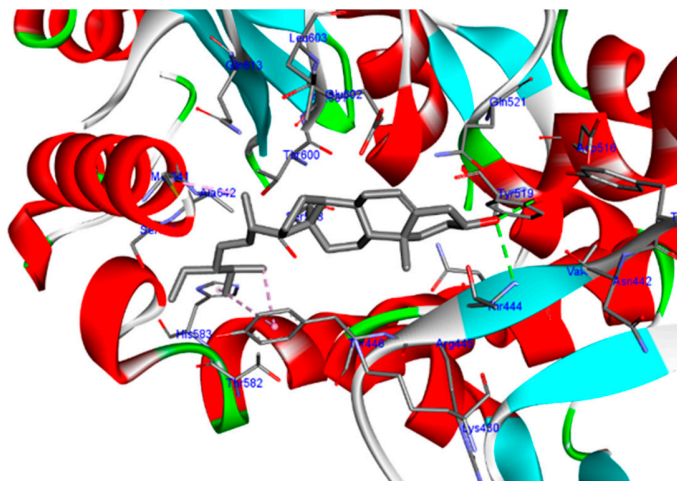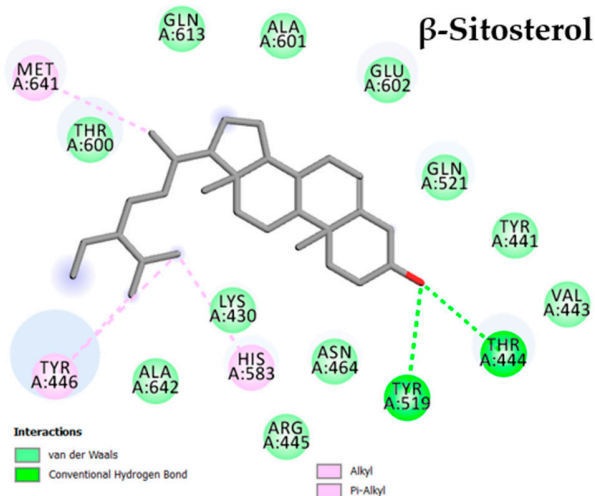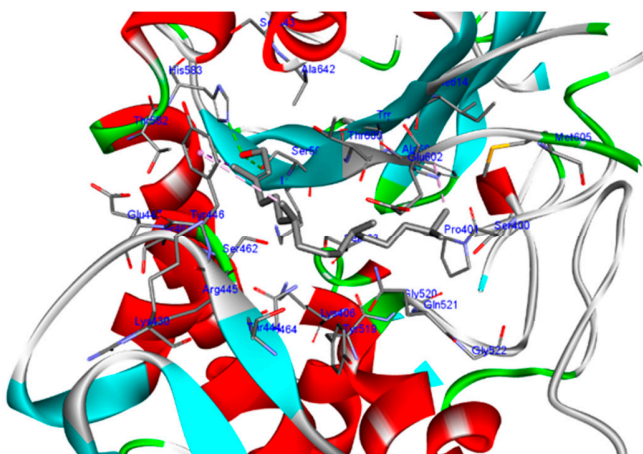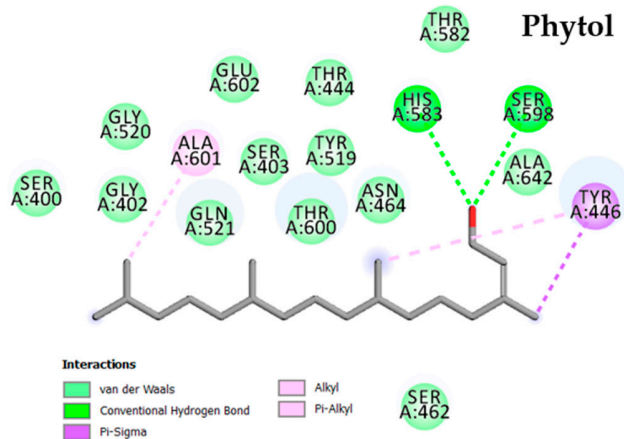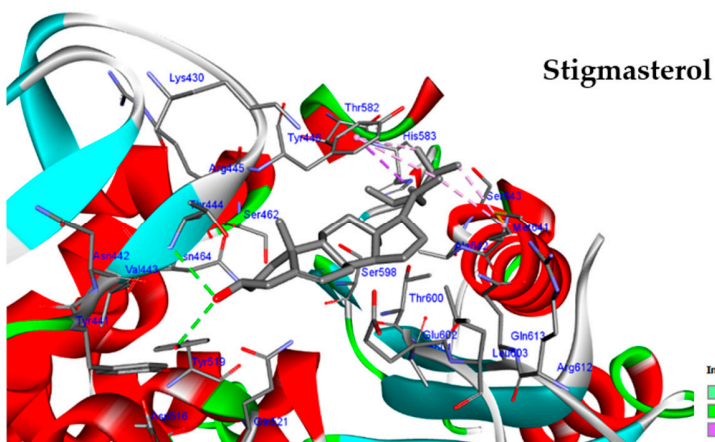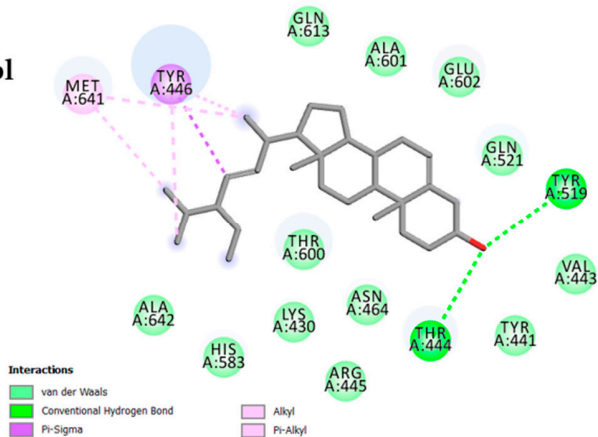

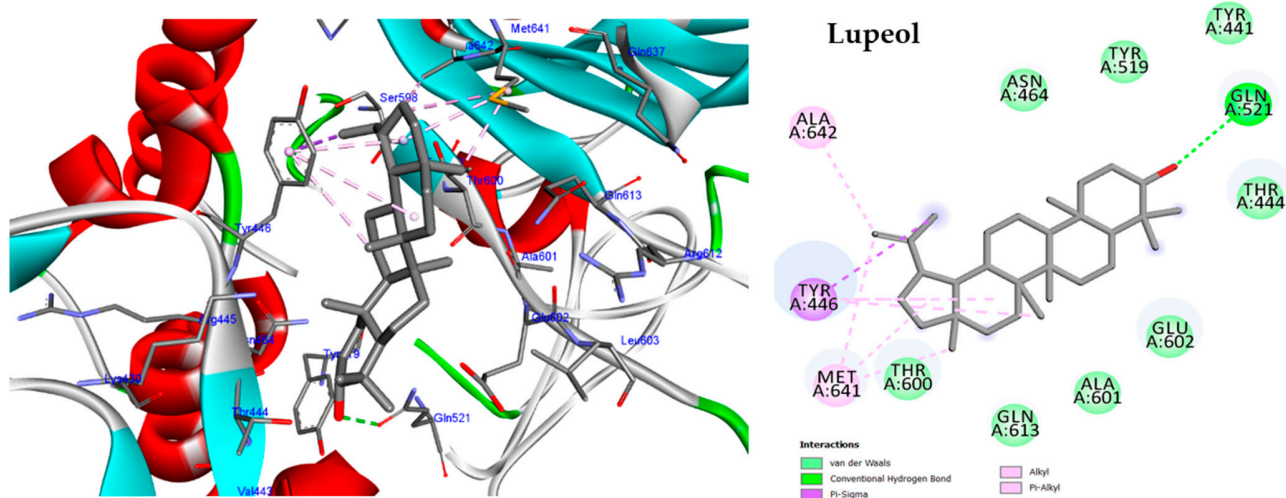

**Figure S2:** Two-dimensional and three-dimensional images of  $\beta$ -sitosterol, phytol, stigmasterol, lupeol, and ceftobiprole docked into the active sites of PBP2A enzyme.

**Table S5.** Types of interactions and docking energy scores of  $\beta$ -sitosterol, phytol, stigmasterol, lupeol, and B7O against Influenza A virus nucleoprotein (NP).

| Influenza A virus nucleoprotein, PDB ID: 6j1u |                     |                      |                    |                    |                          |
|-----------------------------------------------|---------------------|----------------------|--------------------|--------------------|--------------------------|
| Compound                                      | $\beta$ -Sitosterol | Phytol               | Stigmasterol       | Lupeol             | Co- crystal Ligand (B7O) |
| Docking energy score (Kcal/ mol)              | -8.81               | -8.38                | -8.32              | -9.08              | -6.31                    |
| Amino acids/<br>Bond type/<br>Distance (Å)    | Ser283/H-Bond/2.88  | Arg55/H-Bond/2.95    | Ser283/H-Bond/2.84 | Ser283/H-Bond/2.85 | Gly54/C-H-Bond/3.53      |
|                                               | Cys279/H-Bond/3.17  | Asp51/H-Bond/2.97    | Ile41/Alkyl/5.30   | Ser283/H-Bond/3.38 | Asp51/C-H-Bond/2.98      |
|                                               | Ile41/Alkyl/4.69    | Asp51/H-Bond/3.06    | Cys44/Alkyl/4.11   | Cys279/H-Bond/3.32 | Ser283/ C-H-Bond/2.84    |
|                                               | Cys44/Alkyl/4.02    | Ser283/C-H-Bond/3.77 | Ala286/Alkyl/5.27  | Cys44/Alkyl/4.10   | Asp51/Pi-Anion/4.35      |
|                                               | Cys44/Alkyl/3.36    | Arg55/Alkyl/4.56     | Ala286/Alkyl/3.66  | Ala286/Alkyl/3.19  | Cys44/Pi-Sulfur/4.35     |
|                                               | Lys48/Alkyl/4.485   | Cys44/Alkyl/4.89     | Ile41/Alkyl/3.86   | Ile41/Alkyl/4.20   | Ile41/Pi-Alkyl/5.41      |
|                                               |                     | Try40/Pi-Alkyl/5.40  | Cys44/Alkyl/3.85   | Cys44/Alkyl/5.18   | Ile41/Pi-Alkyl/4.94      |
|                                               |                     |                      | Ile41/Alkyl/5.24   | Arg55/Alkyl/4.13   | Ala286/Pi-Alkyl/4.67     |
|                                               |                     |                      |                    | Ile41/Alkyl/4.34   |                          |
|                                               |                     |                      |                    | Cys44/Alkyl/3.45   |                          |

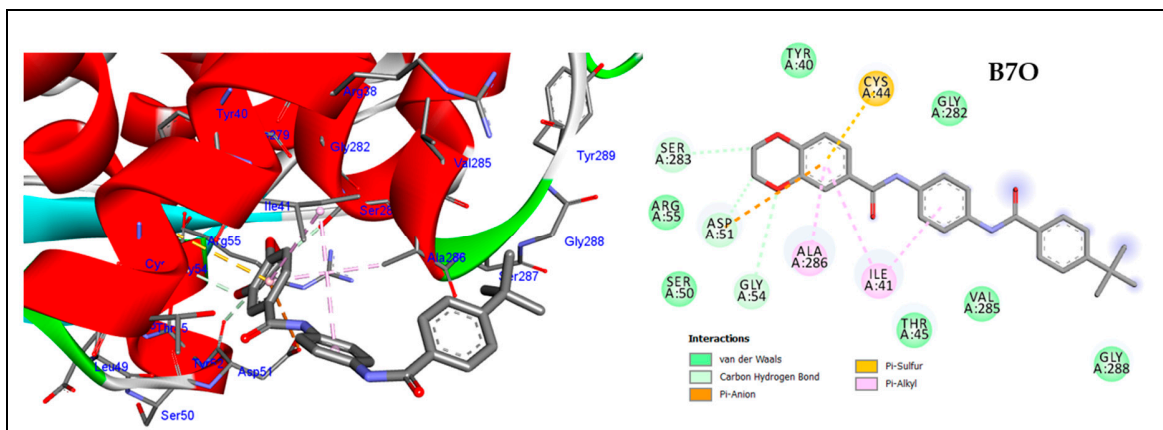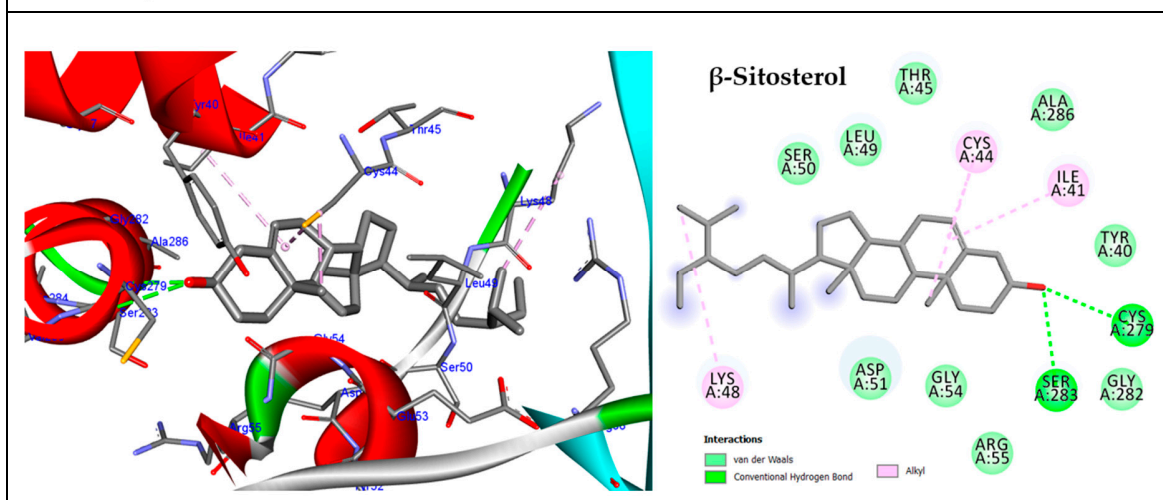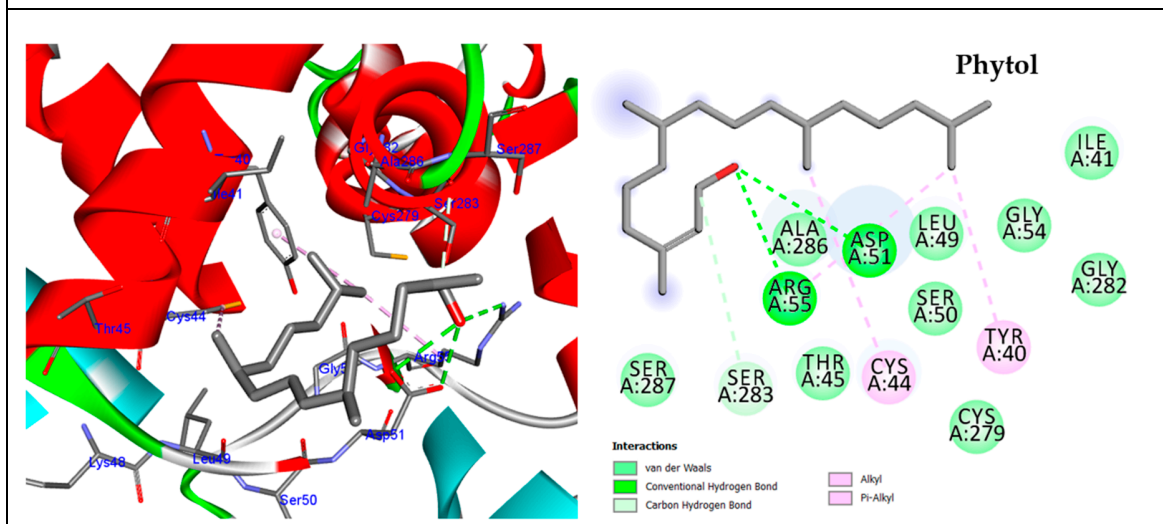

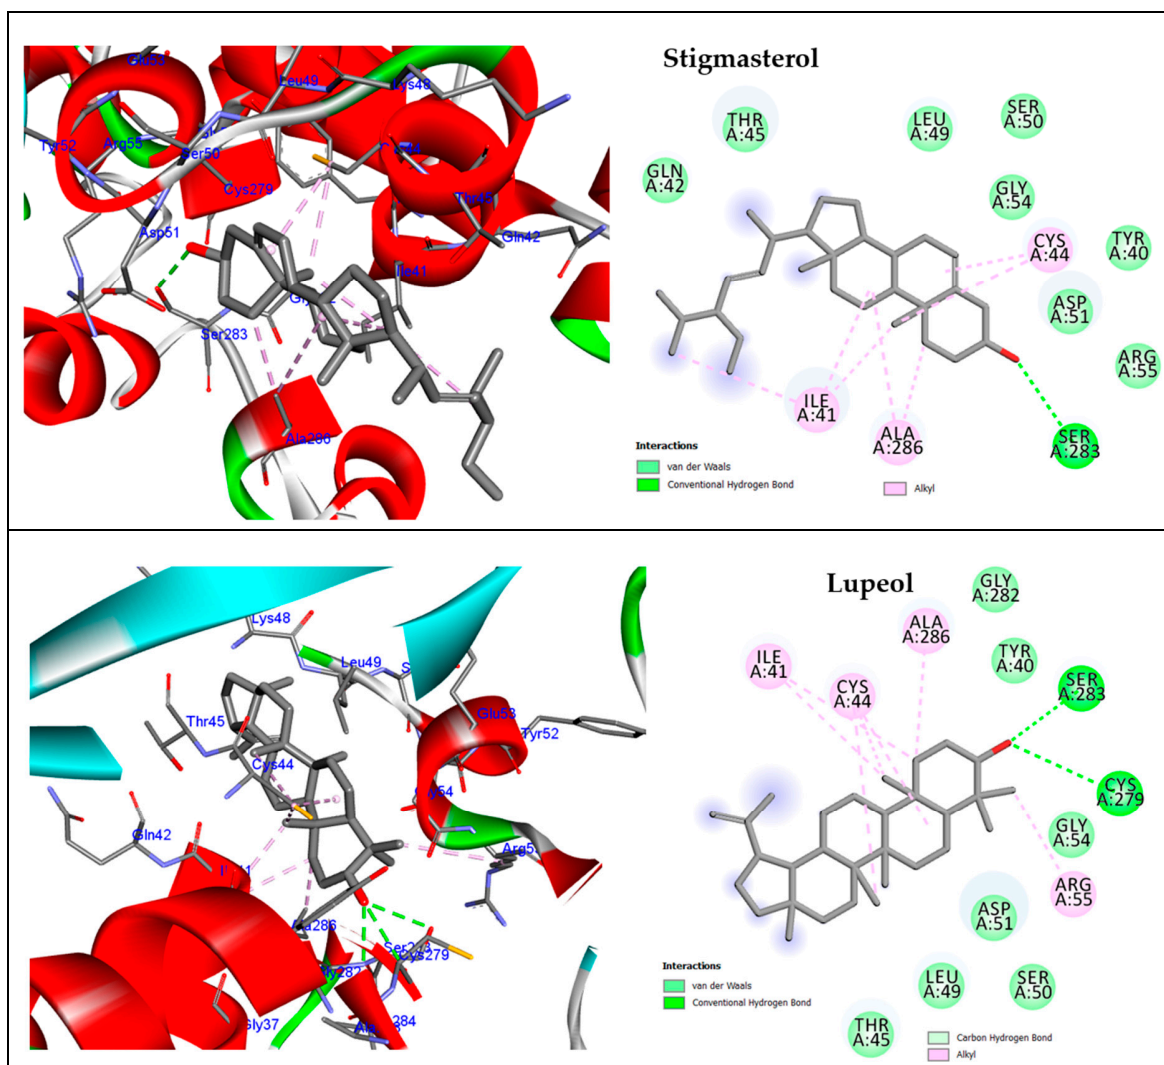

**Figure S3:** Two-dimensional and three-dimensional images of  $\beta$ -sitosterol, phytol, stigmasterol, lupeol, and B7O docked into the active sites of Influenza A virus nucleoprotein (NP).

**Table S6.** Types of interactions and docking energy scores of  $\beta$ -sitosterol, phytol, stigmasterol, lupeol, and 21G against Influenza A virus polymerase.

| Influenza A virus polymerase, PDB ID: 4p1u |                     |        |              |        |                          |
|--------------------------------------------|---------------------|--------|--------------|--------|--------------------------|
| Compound                                   | $\beta$ -Sitosterol | Phytol | Stigmasterol | Lupeol | Co- crystal Ligand (21G) |
| Docking energy score (Kcal/ mol)           | -9.68               | -10.68 | -11.04       | -8.38  | -8.07                    |



|                                                     |                      |                   |                      |                 |                               |
|-----------------------------------------------------|----------------------|-------------------|----------------------|-----------------|-------------------------------|
| <b>Amino acids/<br/>Bond type/<br/>Distance (Å)</b> | Phe404/H-Bond/3.23   | Arg332/H-         | Arg332/H-Bond/2.03   | Ser321/C-H-     | Lys339/Salt bridge/           |
|                                                     | Phe404/Pi-Donor-H-   | Bond/2.98         | Arg332/H-Bond/2.89   | Bond/2.63       | 3.21                          |
|                                                     | Bond/3.37            | Ser337/H-         | Ser337/H-Bond/2.20   | Met426/Alkyl/5. | Lys339/Attractive charge/4.21 |
|                                                     | Met426/Alkyl/4.39    | Bond/3.04         | Phe323/Pi-Alkyl/5.24 | 29              | Arg355/Attractive charge/3.37 |
|                                                     | Phe323/Pi-Alkyl/4.04 | Phe323/Pi-        | Phe323/Pi-Alkyl/5.41 | Arg355/Alkyl/4. | Arg355/H-Bond/2.90            |
|                                                     | Phe325/ Pi-          | Sigma/3.55        | Phe323/Pi-Alkyl/4.38 | 74              | Lys376/H-Bond/3.13            |
|                                                     | Alkyl/4.82           | Met426/Alkyl/4.13 | Phe323/Pi-Alkyl/5.32 | Phe323/Pi-      | Gln406/H-Bond/3.21            |
|                                                     | His357/Pi-Alkyl/3.83 | Lys376/Alkyl/5.23 | Phe323/Pi-Alkyl/5.27 | Alkyl/4.83      | Glu361/H-Bond/2.83            |
|                                                     | His357/Pi-Alkyl/4.19 | Phe323/Pi-        | His357/Pi-Alkyl/4.93 | Phe323/Pi-      | Phe404/C-H-Bond/ 3.34995      |
|                                                     | Phe404/Pi-Alkyl/4.95 | Alkyl/5.47        | His357/Pi-Alkyl/5.24 | Alkyl/3.34      | Phe404/Halogen/3.43           |
|                                                     | Phe404/Pi-Alkyl/5.27 | His357/Pi-        | His357/Pi-Alkyl/4.49 | Phe323/Pi-      | Phe323/ Pi-Pi Stacked/3.67    |
|                                                     | His427/Pi-Alkyl/5.35 | Alkyl/4.52        | His357/Pi-Alkyl/5.28 | Alkyl/5.15      | His357/ Pi-Pi Stacked/3.75    |
|                                                     |                      | Phe363/Pi-        | His427/Pi-Alkyl/4.49 | His357/Pi-      | His357/ Pi-Pi Stacked/3.49    |
|                                                     |                      | Alkyl/4.69        | His427/Pi-Alkyl/4.92 | Alkyl/5.28      | His357/ Pi-Pi Stacked/5.10    |
|                                                     |                      | Phe404/Pi-        |                      | His357/Pi-      | Phe404/ Pi-Pi Stacked/3.86    |
|                                                     |                      | Alkyl/4.01        |                      | Alkyl/5.16      | Phe323/ Pi-Pi Stacked/5.36    |
|                                                     |                      |                   |                      | His357/Pi-      | Phe404/ Pi-Pi Stacked/4.87    |
|                                                     |                      |                   |                      | Alkyl/4.80      | Met426/Alkyl/4.65             |
|                                                     |                      |                   |                      |                 | His427/Pi-Alkyl/5.18          |

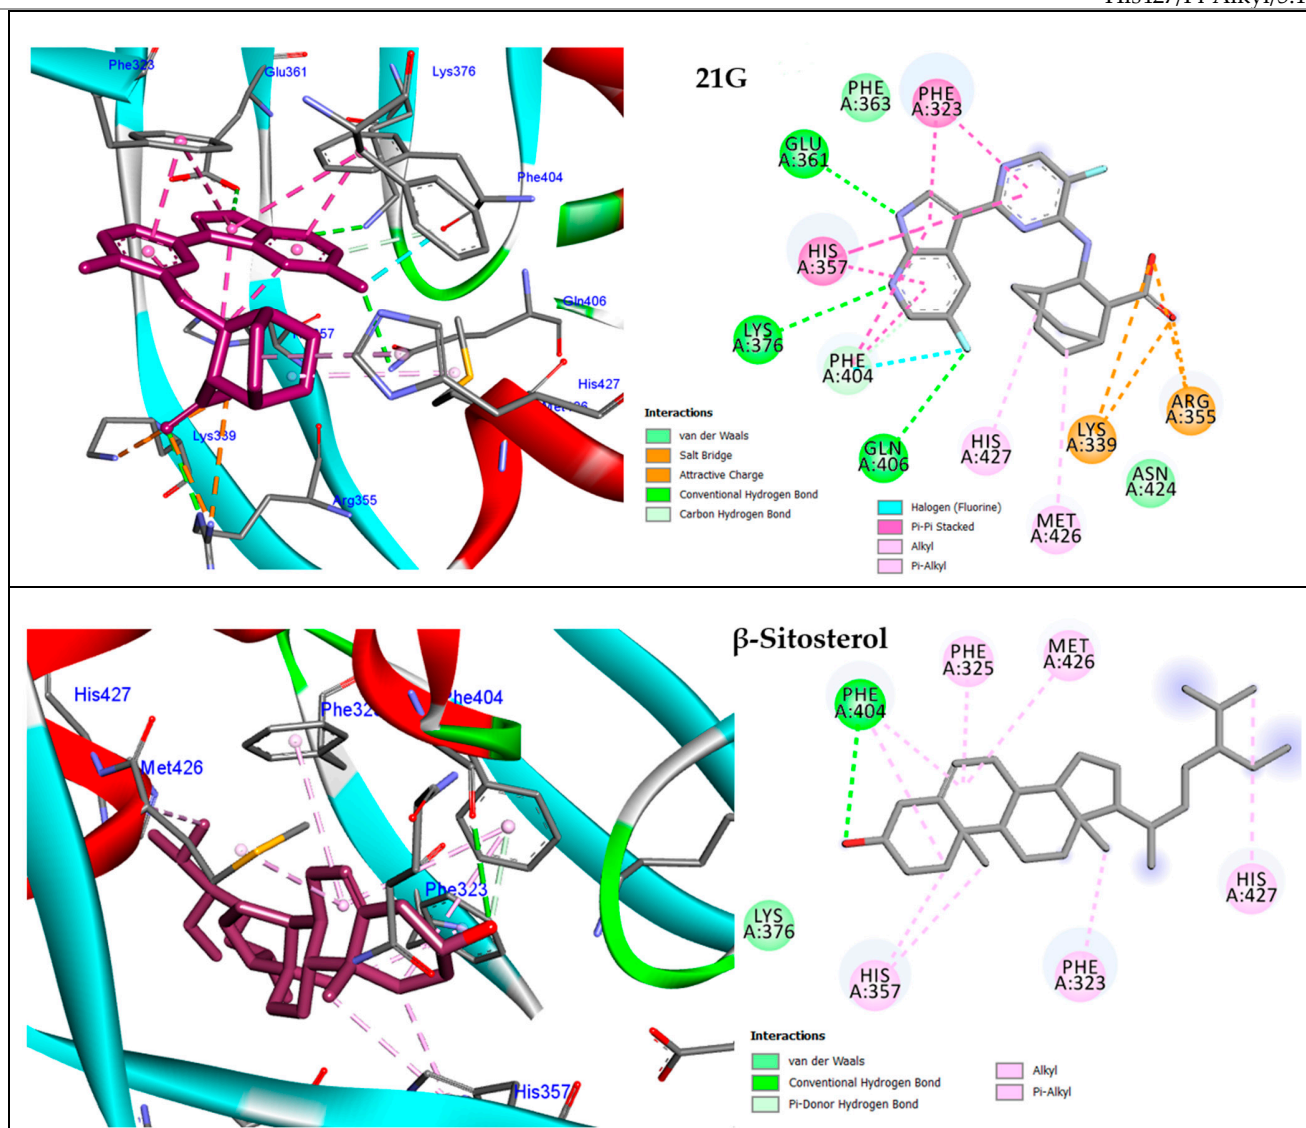

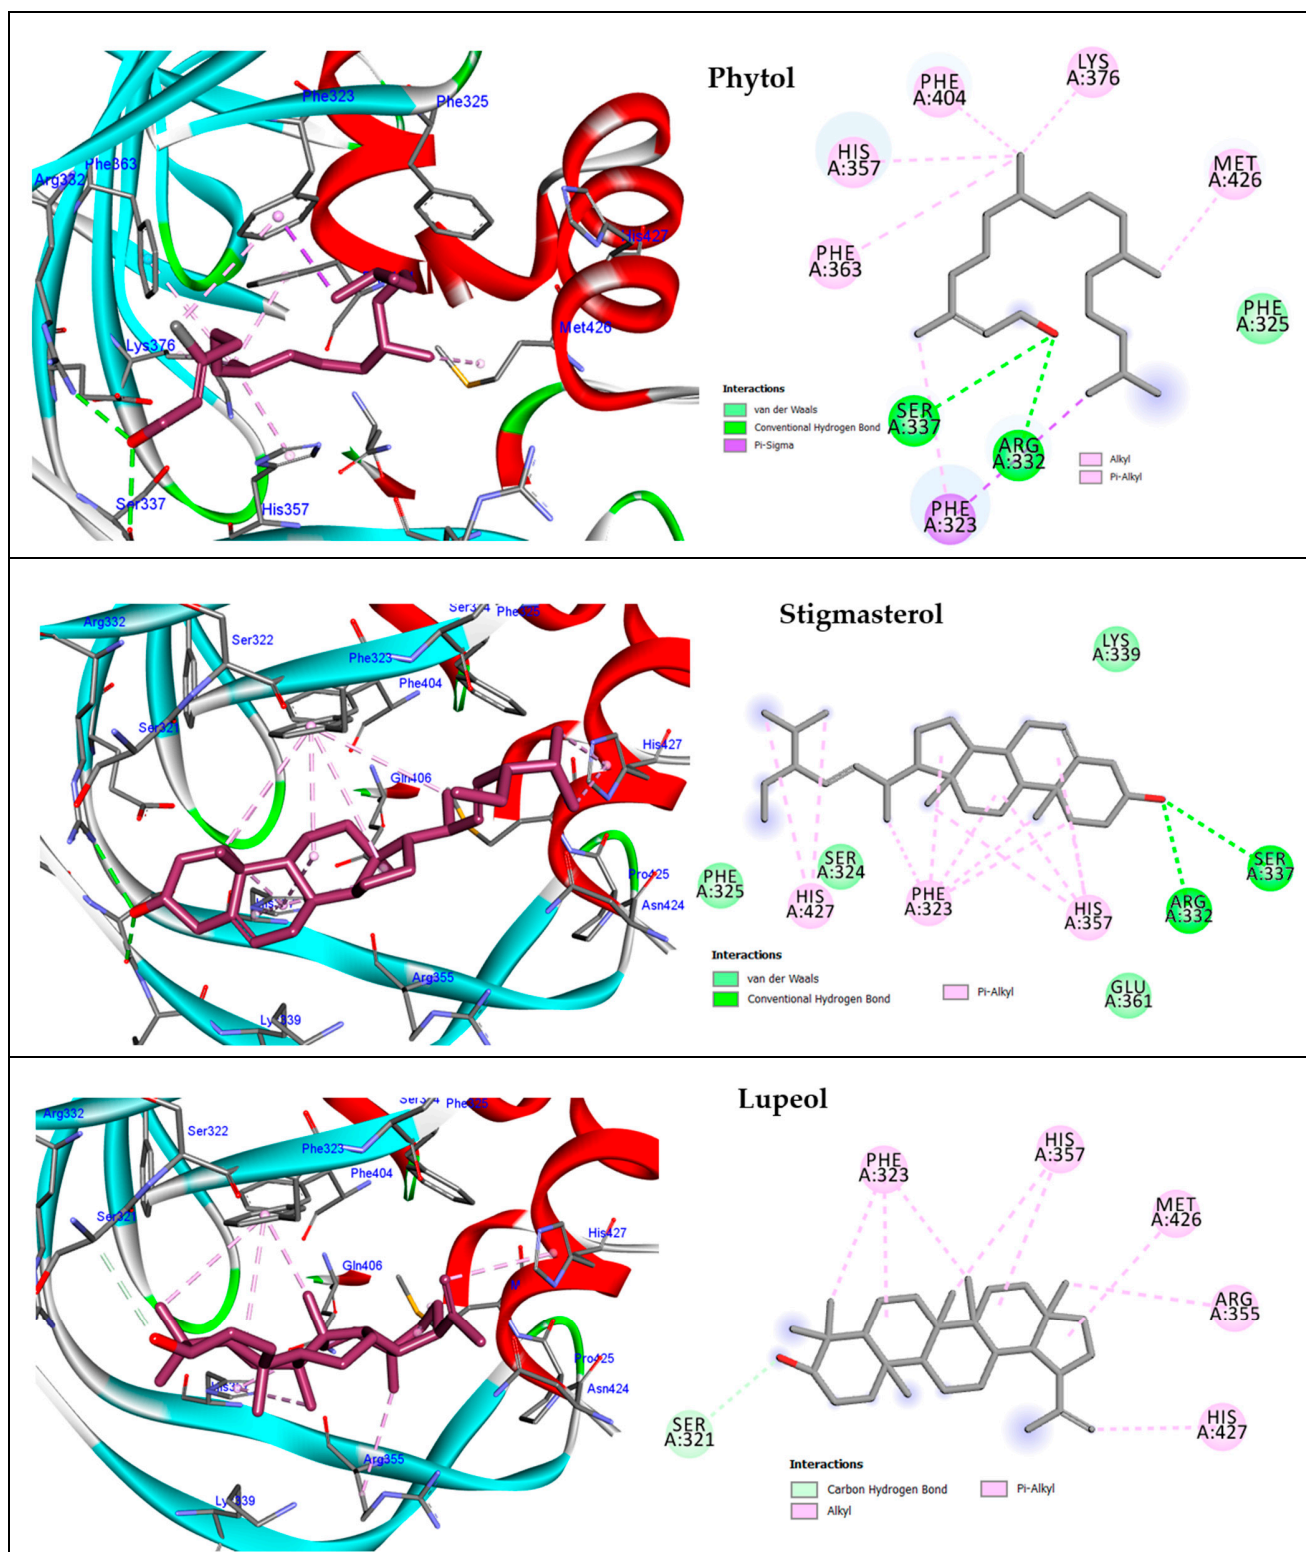

**Figure S4:** Two-dimensional and three-dimensional images of  $\beta$ -sitosterol, phytol, stigmasterol, lupeol, and 21G docked into the active sites of Influenza A virus polymerase.
